# Supplementary material for: Kinematics of phonotactic steering in the walking cricketGryllus bimaculatus(de Geer)
Source: Oxford University Press journal article supplement (doi:10.1242/jeb.044800), 2010-12-08
Supplement: jeb044800tables2.pdf [file jeb044800tables2.pdf]

Table S2. Stepping cycle speed, path length and angle change

[illegible]
